# Supplementary material
Source: publisher figshare collection journal article supplement (https://karger.figshare.com/ndownloader/files/13612007)
Supplement: Supplementary file 1 [file 13612007]

## Supplementary Material

# **Tumor-Secreted Exosomal miR-222 Promotes Tumor Progression Via Regulating P27 Expression and Re-Localization in Pancreatic Cancer**

Zhonghu Li<sup>a</sup> Yang Tao<sup>b</sup> Xiaoya Wang<sup>c</sup> Peng Jiang<sup>d</sup> Jie Li<sup>d</sup> Minjie Peng<sup>e</sup>  
Xi Zhang<sup>d</sup> Kai Chen<sup>d</sup> Hui Liu<sup>e</sup> Ping Zhen<sup>d</sup> Jin Zhu<sup>d</sup> Xiangde Liu<sup>e</sup> Xiaowu Li<sup>d,e</sup>

<sup>a</sup>Hepatobiliary Surgery Institute, Southwest Hospital, Army Medical University, Current address: Department of General Surgery, General Hospital of Wuhan, People's Liberation Army, Wuhan, <sup>b</sup>Chongqing Key Laboratory of Translational Research for Cancer Metastasis and Individualized Treatment, Chongqing University Cancer Hospital & Chongqing Cancer Institute & Chongqing Cancer Hospital, Chongqing, <sup>c</sup>Department of Neurosurgery, the Second Affiliated Hospital of North Sichuan Medical College, Nanchong, <sup>d</sup>Hepatobiliary Surgery Institute, Southwest Hospital, Army Medical University, <sup>e</sup>Hepatobiliary Surgery & Carson International Cancer Shenzhen University General Hospital & Shenzhen University Clinical Medical Academy Center, Shenzhen University, Shenzhen, China

### **Supplementary figure legends**

**Fig S1 (A-D)** Representative images of indicate treated Capan-1 (A-B) or Hs 766T-L3 (C-D) stained by TRITC-conjugated Phalloidin to indicate actin filaments and counterstained by FITC-conjugated vinculin to show focal contacts. The white arrows indicate the filopodia or lamellipodia. Scale bars = 50  $\mu\text{m}$ .

**Fig S2 (A-F)** The proliferation abilities of indicate treated Capan-1 (A-C) or Hs 766T-L3 (D-F) cells measured by EdU assays. Scale bars = 50  $\mu\text{m}$ .

**Fig S3 (A-B)** The relative protein levels of p27 in indicate treated Capan-1 cells measured by immunofluorescence assays. Scale bars = 50  $\mu\text{m}$ .

**Fig S4 (A)** Dil labeled exosomes were added into Calcein AM labeled Capan-1 cells for co-cultivation, images were captured with fluorescence microscope, the white arrows indicate exosomes. Scale bars = 25  $\mu\text{m}$ . **(B)** Exosomes of GFP-CD63-Hs 766T-L3 were purified and added into RFP labeled Capan-1 cells for co-cultivation, images were captured with fluorescence microscope, the white arrows indicate exosomes. Scale bars = 25  $\mu\text{m}$ . **(C)** RFP-labeled Capan-1 cells were co-cultured with GFP-CD63-Hs 766T-L3, then images were captured with fluorescence microscope. Scale bars = 25  $\mu\text{m}$ . **(D)** Dio labeled exosomes of ov cy5-miR-222 Hs 766T-L3 were added into Capan-1 cells for co-cultivation, images were captured with fluorescence microscope. Scale bars = 25  $\mu\text{m}$ .

**A**

Capan-1 NC

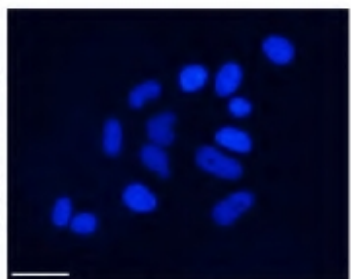

DAPI

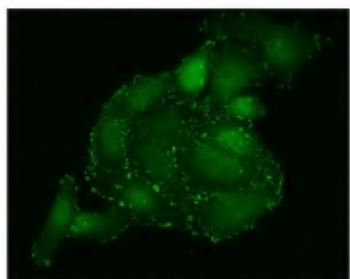

FITC-Vinculin

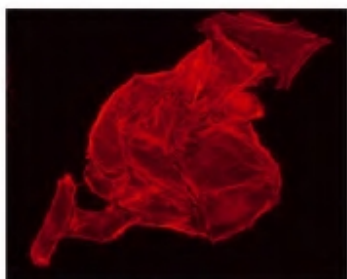

TRITC-Phalloidin

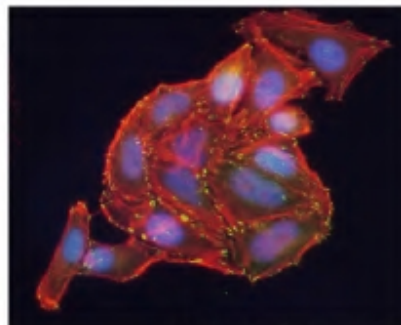

Merge

**B**

Capan-1 ov miR-222

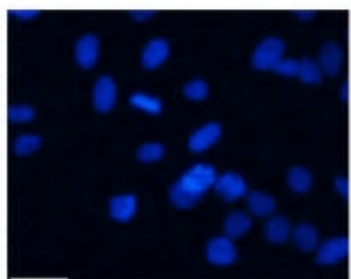

DAPI

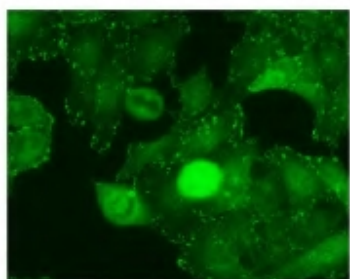

FITC-Vinculin

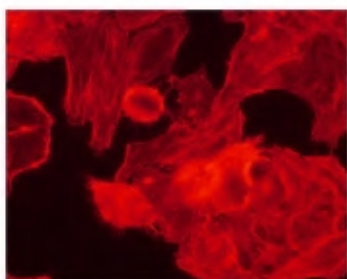

TRITC-Phalloidin

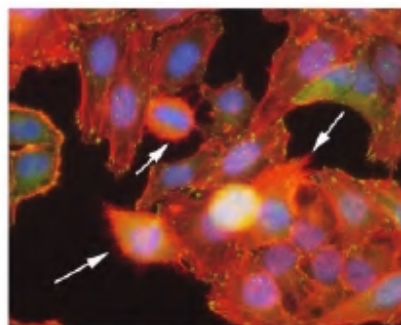

Merge

**C**

Hs 766T-L3 NC

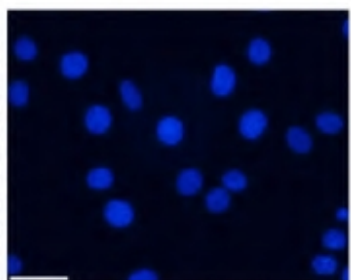

DAPI

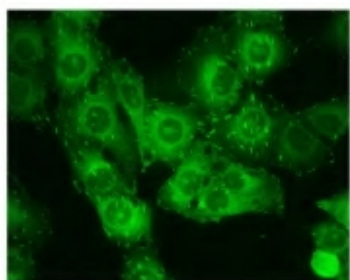

FITC-Vinculin

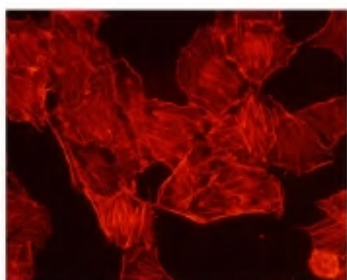

TRITC-Phalloidin

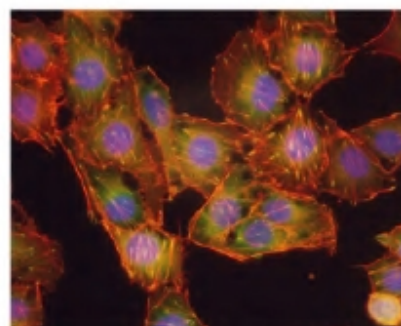

Merge

**D**

Hs 766T-L3 ov miR-222

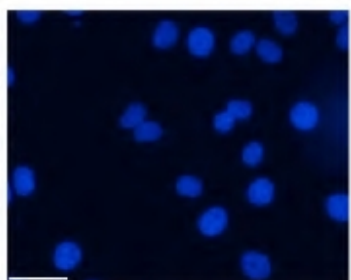

DAPI

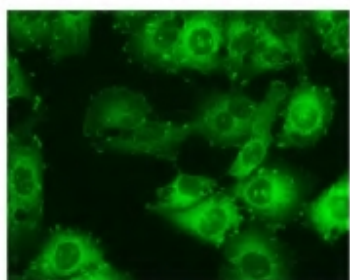

FITC-Vinculin

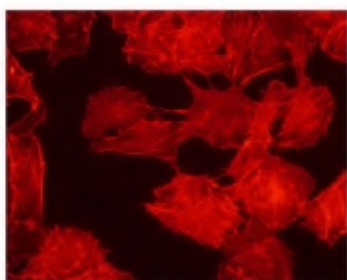

TRITC-Phalloidin

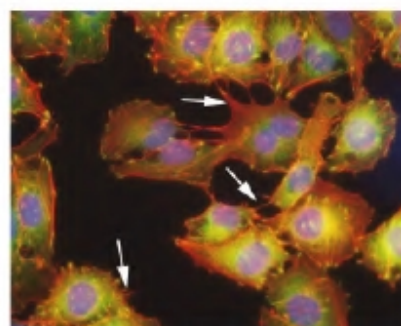

Merge

**A**

Capan-1 NC

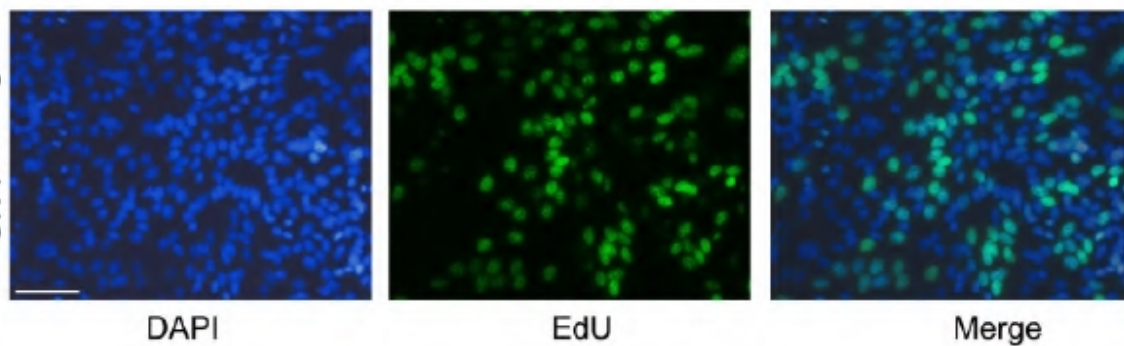**B**

Capan-1 ov miR-222

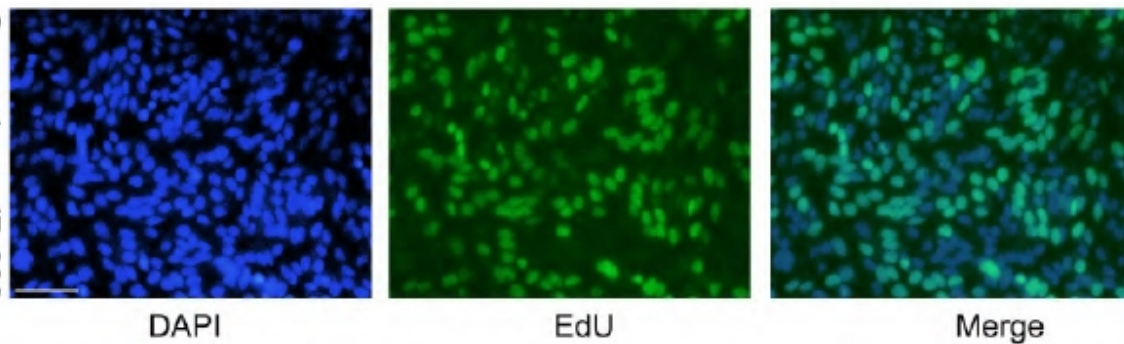**D**

Hs 766T-L3 NC

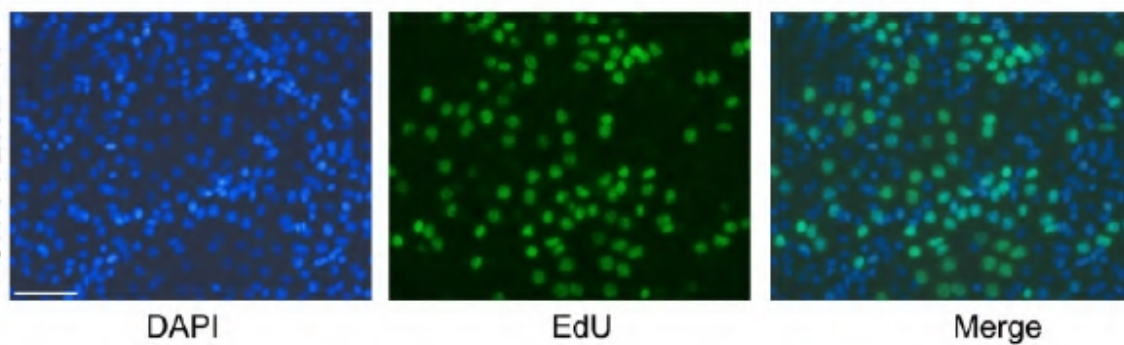**E**

Hs 766T-L3 ov miR-222

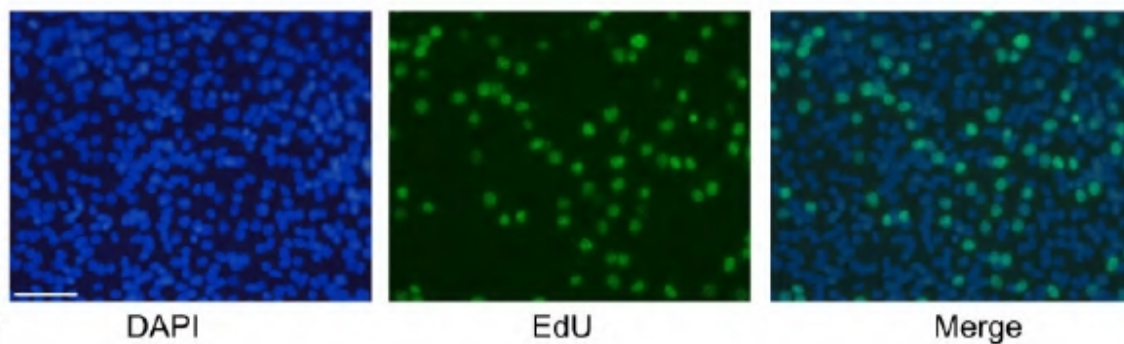**C**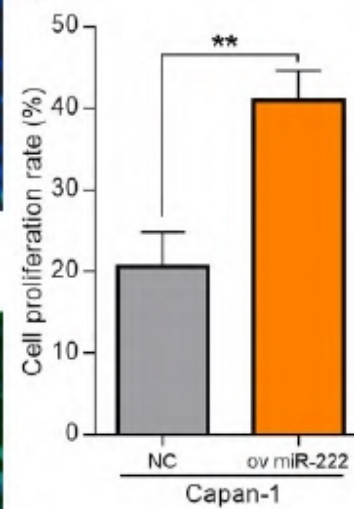**F**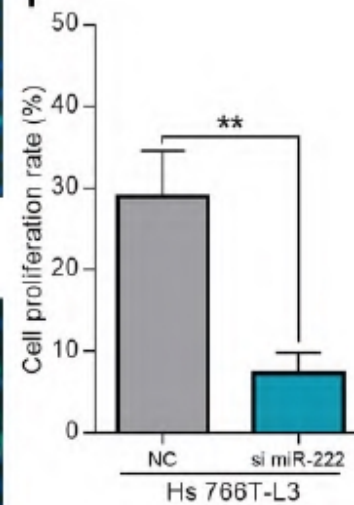



**A**

Capan-1 NC

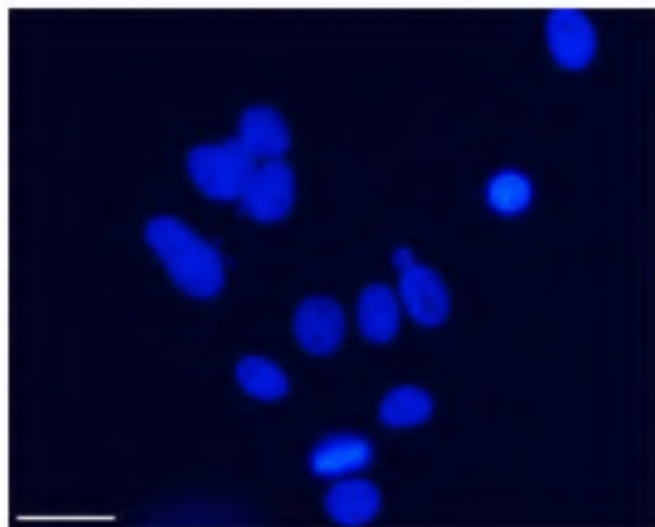

DAPI

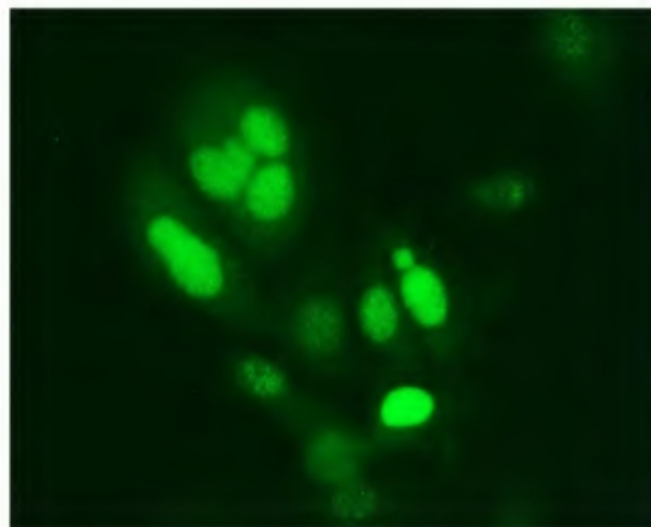

FITC-p27

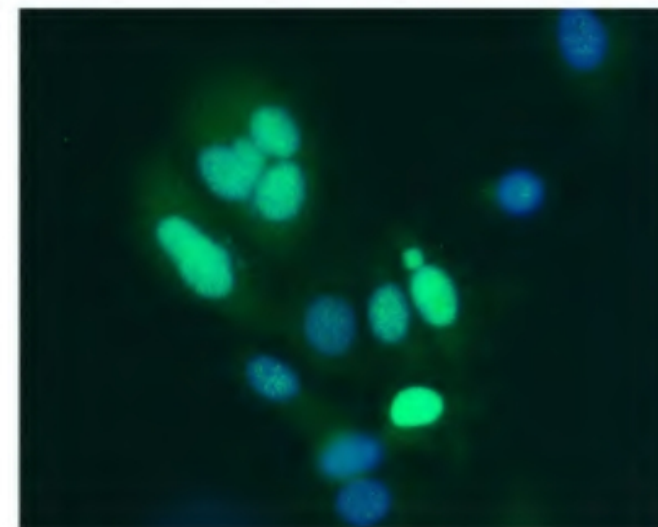

Merge

**B**

Capan-1 ov miR-222

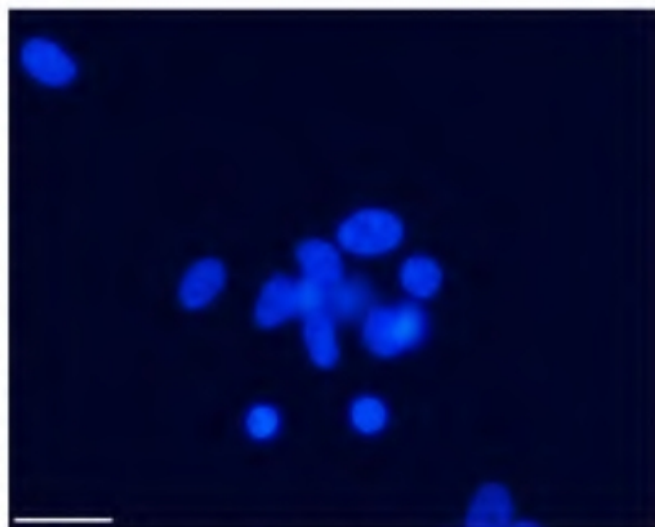

DAPI

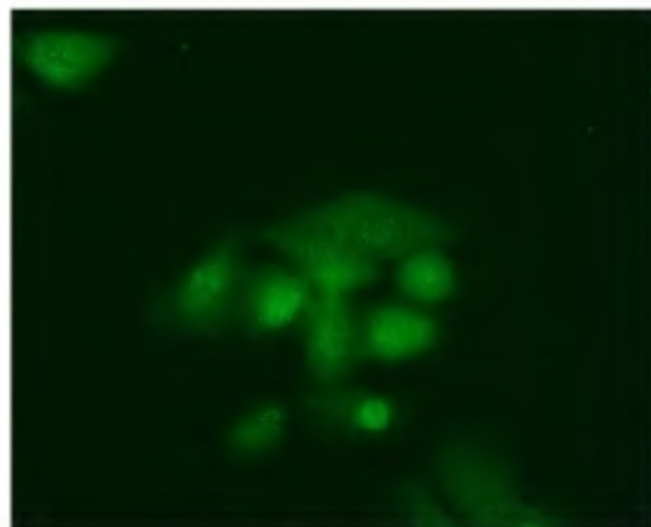

FITC-p27

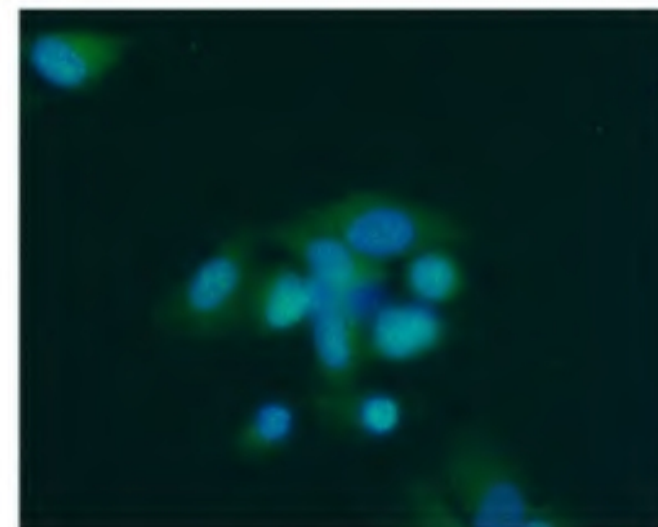

Merge

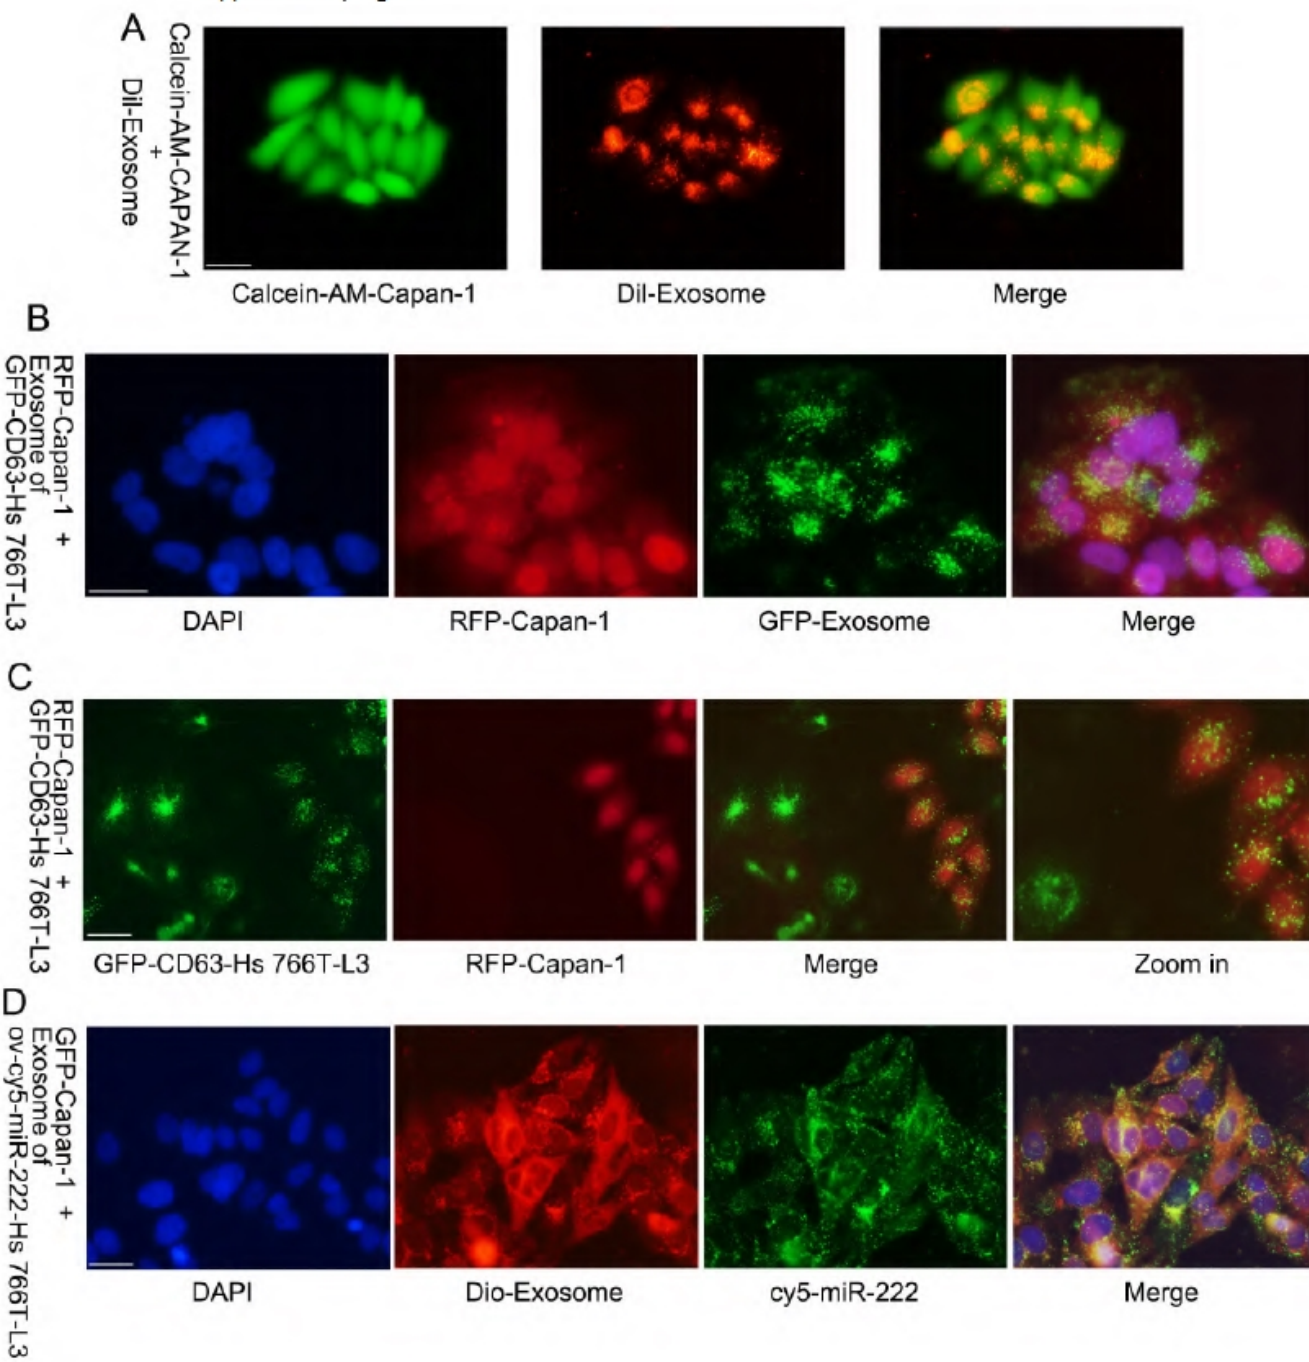

Table S1. Sequence of WILD-Type Human p27 or Mutant p27.

|                                                                                                                                                                                                                                                                                                                                                                                                                                                                                                                                                                                                                                                                                                   |
|---------------------------------------------------------------------------------------------------------------------------------------------------------------------------------------------------------------------------------------------------------------------------------------------------------------------------------------------------------------------------------------------------------------------------------------------------------------------------------------------------------------------------------------------------------------------------------------------------------------------------------------------------------------------------------------------------|
| pGL3 p27                                                                                                                                                                                                                                                                                                                                                                                                                                                                                                                                                                                                                                                                                          |
| <p>aca gctcgaatta agaatatgtt tccttgttta tcagatacat cactgcttga tgaagcaagg aagatataca tgaaaatttt</p> <p>aaaaatacat atcgctgact tcatggaatg gacatcctgt ataagcactg aaaaacaaca acacaataac actaaaattt</p> <p>taggcactct taaatgatct gcctctaaaa gcgttggatgtagcattatg caattagggt ttccttatt tgcttcattg tactacctgt</p> <p>gtatatagtt ttacctttt atgtagcaca taaactttgg ggaagggagg gcaggggtggg gctgaggaac tgacgtggag</p> <p>cggggtatga agagcttgct ttgatttaca gcaagtagat aaatatttga cttgcatgaa gagaagcaat ttggggaag</p> <p>ggtttgaatt gttttcttta aagatgtaat gtcccttca gagacagctg atacttcatt taaaaaatc acaaaaattt</p> <p>gaacactggc taaagataat tgctatttat tttaacaaga agtttattct catttgggag atctggtgat ctccaagct</p> |
| pGL3 mut-p27                                                                                                                                                                                                                                                                                                                                                                                                                                                                                                                                                                                                                                                                                      |
| <p>aca gctcgaatta agaatatgtt tccttgttta tcagatacat cactgcttga tgaagcaagg aagatataca tgaaaatttt</p> <p>aaaaatacat atcgctgact tcatggaatg gacatcctgt ataagcactg aaaaacaaca acacaataac actaaaattt</p> <p>taggcactct taaatgatct gcctctaaaa gcgttggttatg caattagggt ttccttatt tgcttcattg tactacctgt</p> <p>gtatatagtt ttacctttt ca taaactttgg ggaagggagg gcaggggtggg gctgaggaac tgacgtggag cggggtatga</p> <p>agagcttgct ttgatttaca gcaagtagat aaatatttga cttgcatgaa gagaagcaat ttggggaag ggtttgaatt</p> <p>gtttcttta aagatgtaat gtcccttca gagacagctg atacttcatt taaaaaatc acaaaaattt gaacactggc</p> <p>taaagataat tgctatttat tttaacaaga agtttattct catttgggag atctggtgat ctccaagct</p>                  |
